# Supplementary material
Source: publisher figshare collection journal article supplement (https://acs.figshare.com/ndownloader/files/4390978)
Supplement: Supplementary file 1 [file 4390978]

  
data_cas27 
  
_audit_creation_method            SHELXL-97 
_chemical_name_systematic 
; 
 ? 
; 
_chemical_name_common             ? 
_chemical_melting_point           ? 
_chemical_formula_moiety          ? 
_chemical_formula_sum 
 'C38 H32 O4 Ru' 
_chemical_formula_weight          653.71 
  
loop_ 
 _atom_type_symbol 
 _atom_type_description 
 _atom_type_scat_dispersion_real 
 _atom_type_scat_dispersion_imag 
 _atom_type_scat_source 
 'C'  'C'   0.0033   0.0016 
 'International Tables Vol C Tables 4.2.6.8 and 6.1.1.4' 
 'H'  'H'   0.0000   0.0000 
 'International Tables Vol C Tables 4.2.6.8 and 6.1.1.4' 
 'O'  'O'   0.0106   0.0060 
 'International Tables Vol C Tables 4.2.6.8 and 6.1.1.4' 
 'Ru'  'Ru'  -1.2594   0.8363 
 'International Tables Vol C Tables 4.2.6.8 and 6.1.1.4' 
  
_symmetry_cell_setting            Monoclinic 
_symmetry_space_group_name_H-M    P2(1)/c 
  
loop_ 
 _symmetry_equiv_pos_as_xyz 
 'x, y, z' 
 '-x, y+1/2, -z+1/2' 
 '-x, -y, -z' 
 'x, -y-1/2, z-1/2' 
  
_cell_length_a                    12.3887(15) 
_cell_length_b                    7.5387(9) 
_cell_length_c                    33.963(4) 
_cell_angle_alpha                 90.00 
_cell_angle_beta                  93.802(2) 
_cell_angle_gamma                 90.00 
_cell_volume                      3165.0(7) 
_cell_formula_units_Z             4 
_cell_measurement_temperature     173(2) 
_cell_measurement_reflns_used     ? 
_cell_measurement_theta_min       ? 
_cell_measurement_theta_max       ? 
  
_exptl_crystal_description        ? 
_exptl_crystal_colour             ? 
_exptl_crystal_size_max           0.53 
_exptl_crystal_size_mid           0.11 
_exptl_crystal_size_min           0.02 
_exptl_crystal_density_meas       0 
_exptl_crystal_density_diffrn     1.372 
_exptl_crystal_density_method     'not measured' 
_exptl_crystal_F_000              1344 
_exptl_absorpt_coefficient_mu     0.534 
_exptl_absorpt_correction_type    none 
_exptl_absorpt_correction_T_min   0.7649 
_exptl_absorpt_correction_T_max   0.9894 
_exptl_absorpt_process_details    ? 
  
_exptl_special_details 
; 
 ? 
; 
  
_diffrn_ambient_temperature       173(2) 
_diffrn_radiation_wavelength      0.71073 
_diffrn_radiation_type            MoK\a 
_diffrn_radiation_source          'fine-focus sealed tube' 
_diffrn_radiation_monochromator   graphite 
_diffrn_measurement_device_type   'CCD area detector' 
_diffrn_measurement_method        'phi and omega scans' 
_diffrn_detector_area_resol_mean  ? 
_diffrn_standards_number          ? 
_diffrn_standards_interval_count  ? 
_diffrn_standards_interval_time   ? 
_diffrn_standards_decay_%         ? 
_diffrn_reflns_number             4965 
_diffrn_reflns_av_R_equivalents   0.0000 
_diffrn_reflns_av_sigmaI/netI     0.0661 
_diffrn_reflns_limit_h_min        -14 
_diffrn_reflns_limit_h_max        14 
_diffrn_reflns_limit_k_min        0 
_diffrn_reflns_limit_k_max        8 
_diffrn_reflns_limit_l_min        0 
_diffrn_reflns_limit_l_max        38 
_diffrn_reflns_theta_min          1.97 
_diffrn_reflns_theta_max          24.00 
_reflns_number_total              4965 
_reflns_number_gt                 4078 
_reflns_threshold_expression      >2sigma(I) 
  
_computing_data_collection        'Bruker SMART' 
_computing_cell_refinement        'Bruker SMART' 
_computing_data_reduction         'Bruker SAINT' 
_computing_structure_solution     'SHELXS-97 (Sheldrick, 1990)' 
_computing_structure_refinement   'SHELXL-97 (Sheldrick, 1997)' 
_computing_molecular_graphics     'Bruker SHELXTL' 
_computing_publication_material   'Bruker SHELXTL' 
  
_refine_special_details 
; 
 Refinement of F^2^ against ALL reflections.  The weighted R-factor wR and 
 goodness of fit S are based on F^2^, conventional R-factors R are based 
 on F, with F set to zero for negative F^2^. The threshold expression of 
 F^2^ > 2sigma(F^2^) is used only for calculating R-factors(gt) etc. and is 
 not relevant to the choice of reflections for refinement.  R-factors based 
 on F^2^ are statistically about twice as large as those based on F, and R- 
 factors based on ALL data will be even larger. 
; 
  
_refine_ls_structure_factor_coef  Fsqd 
_refine_ls_matrix_type            full 
_refine_ls_weighting_scheme       calc 
_refine_ls_weighting_details 
 'calc w=1/[\s^2^(Fo^2^)+(0.0348P)^2^+18.3216P] where P=(Fo^2^+2Fc^2^)/3' 
_atom_sites_solution_primary      direct 
_atom_sites_solution_secondary    difmap 
_atom_sites_solution_hydrogens    geom 
_refine_ls_hydrogen_treatment     mixed 
_refine_ls_extinction_method      none 
_refine_ls_extinction_coef        ? 
_refine_ls_number_reflns          4965 
_refine_ls_number_parameters      338 
_refine_ls_number_restraints      6 
_refine_ls_R_factor_all           0.1007 
_refine_ls_R_factor_gt            0.0801 
_refine_ls_wR_factor_ref          0.1531 
_refine_ls_wR_factor_gt           0.1459 
_refine_ls_goodness_of_fit_ref    1.199 
_refine_ls_restrained_S_all       1.198 
_refine_ls_shift/su_max           0.000 
_refine_ls_shift/su_mean          0.000 
  
loop_ 
 _atom_site_label 
 _atom_site_type_symbol 
 _atom_site_fract_x 
 _atom_site_fract_y 
 _atom_site_fract_z 
 _atom_site_U_iso_or_equiv 
 _atom_site_adp_type 
 _atom_site_occupancy 
 _atom_site_symmetry_multiplicity 
 _atom_site_calc_flag 
 _atom_site_refinement_flags 
 _atom_site_disorder_assembly 
 _atom_site_disorder_group 
Ru Ru 0.78944(5) 0.32924(8) 0.111559(16) 0.02172(18) Uani 1 1 d . A . 
O1 O 0.9601(3) 0.6572(7) 0.09394(13) 0.0299(12) Uani 1 1 d . . . 
H1 H 0.9490 0.6870 0.0702 0.045 Uiso 1 1 calc R . . 
O2 O 0.8217(5) 0.0066(8) 0.16363(18) 0.0563(18) Uani 1 1 d . . . 
O3 O 0.6169(5) 0.1346(8) 0.06178(18) 0.0503(16) Uani 1 1 d . . . 
O4 O 0.9711(5) 0.3046(11) -0.02403(17) 0.072(2) Uani 1 1 d . . . 
C1 C 0.8658(5) 0.6151(9) 0.1088(2) 0.0214(16) Uani 1 1 d . . . 
C2 C 0.8619(5) 0.5595(9) 0.14900(19) 0.0198(16) Uani 1 1 d . . . 
C3 C 0.7469(5) 0.5368(9) 0.15567(19) 0.0205(15) Uani 1 1 d . . . 
C4 C 0.6851(5) 0.5682(9) 0.11942(18) 0.0193(15) Uani 1 1 d . . . 
C5 C 0.7594(5) 0.6096(9) 0.0894(2) 0.0209(16) Uani 1 1 d . . . 
C6 C 0.9548(3) 0.5581(6) 0.17881(12) 0.0243(17) Uani 1 1 d G . . 
C7 C 1.0341(3) 0.6879(6) 0.17717(12) 0.0277(17) Uani 1 1 d G . . 
H7 H 1.0274 0.7774 0.1575 0.033 Uiso 1 1 calc R . . 
C8 C 1.1230(3) 0.6868(6) 0.20436(14) 0.0357(19) Uani 1 1 d G . . 
H8 H 1.1772 0.7755 0.2032 0.043 Uiso 1 1 calc R . . 
C9 C 1.1327(3) 0.5559(7) 0.23319(12) 0.035(2) Uani 1 1 d G . . 
H9 H 1.1935 0.5551 0.2518 0.042 Uiso 1 1 calc R . . 
C10 C 1.0535(4) 0.4261(6) 0.23484(13) 0.037(2) Uani 1 1 d G . . 
H10 H 1.0601 0.3366 0.2545 0.044 Uiso 1 1 calc R . . 
C11 C 0.9645(3) 0.4272(6) 0.20765(14) 0.036(2) Uani 1 1 d G . . 
H11 H 0.9103 0.3385 0.2088 0.043 Uiso 1 1 calc R . . 
C12 C 0.7027(4) 0.5137(6) 0.19566(10) 0.0226(16) Uani 1 1 d G . . 
C13 C 0.6558(4) 0.3571(5) 0.20775(12) 0.0271(17) Uani 1 1 d G . . 
H13 H 0.6514 0.2573 0.1906 0.033 Uiso 1 1 calc R . . 
C14 C 0.6154(4) 0.3464(6) 0.24490(13) 0.037(2) Uani 1 1 d G . . 
H14 H 0.5834 0.2393 0.2532 0.044 Uiso 1 1 calc R . . 
C15 C 0.6219(4) 0.4923(7) 0.26995(10) 0.038(2) Uani 1 1 d G . . 
C16 C 0.6689(4) 0.6490(6) 0.25786(12) 0.042(2) Uani 1 1 d G . . 
H16 H 0.6733 0.7487 0.2750 0.050 Uiso 1 1 calc R . . 
C17 C 0.7092(4) 0.6596(5) 0.22072(13) 0.0379(19) Uani 1 1 d G . . 
H17 H 0.7413 0.7667 0.2125 0.046 Uiso 1 1 calc R . . 
C18 C 0.5772(8) 0.4794(15) 0.3111(2) 0.064(3) Uani 1 1 d . . . 
H18A H 0.5471 0.3607 0.3147 0.096 Uiso 1 1 calc R . . 
H18B H 0.5203 0.5683 0.3135 0.096 Uiso 1 1 calc R . . 
H18C H 0.6357 0.5009 0.3314 0.096 Uiso 1 1 calc R . . 
C19 C 0.5646(2) 0.5871(6) 0.11374(14) 0.0217(16) Uani 1 1 d G . . 
C20 C 0.4943(3) 0.4585(5) 0.12640(14) 0.0326(19) Uani 1 1 d G . . 
H20 H 0.5223 0.3529 0.1385 0.039 Uiso 1 1 calc R . . 
C21 C 0.3832(3) 0.4844(6) 0.12141(15) 0.040(2) Uani 1 1 d G . . 
H21 H 0.3351 0.3965 0.1301 0.048 Uiso 1 1 calc R . . 
C22 C 0.3423(2) 0.6389(7) 0.10376(15) 0.040(2) Uani 1 1 d G . . 
C23 C 0.4125(4) 0.7675(6) 0.09110(14) 0.038(2) Uani 1 1 d G . . 
H23 H 0.3846 0.8731 0.0790 0.046 Uiso 1 1 calc R . . 
C24 C 0.5237(3) 0.7416(5) 0.09609(14) 0.0298(18) Uani 1 1 d G . . 
H24 H 0.5717 0.8295 0.0874 0.036 Uiso 1 1 calc R . . 
C25 C 0.2201(7) 0.6686(17) 0.0971(3) 0.074(3) Uani 1 1 d . . . 
H25A H 0.1815 0.5674 0.1076 0.111 Uiso 1 1 calc R . . 
H25B H 0.2007 0.6802 0.0688 0.111 Uiso 1 1 calc R . . 
H25C H 0.1999 0.7772 0.1107 0.111 Uiso 1 1 calc R . . 
C26 C 0.7313(3) 0.6692(6) 0.04749(9) 0.0228(15) Uani 1 1 d G . . 
C27 C 0.6597(4) 0.5719(5) 0.02276(12) 0.0277(17) Uani 1 1 d G . . 
H27 H 0.6294 0.4650 0.0319 0.033 Uiso 1 1 calc R . . 
C28 C 0.6324(4) 0.6310(6) -0.01537(12) 0.037(2) Uani 1 1 d G . . 
H28 H 0.5835 0.5645 -0.0323 0.044 Uiso 1 1 calc R . . 
C29 C 0.6768(4) 0.7874(6) -0.02878(10) 0.036(2) Uani 1 1 d G . . 
H29 H 0.6581 0.8278 -0.0548 0.043 Uiso 1 1 calc R . . 
C30 C 0.7484(4) 0.8847(5) -0.00405(13) 0.0332(19) Uani 1 1 d G . . 
H30 H 0.7787 0.9916 -0.0132 0.040 Uiso 1 1 calc R . . 
C31 C 0.7757(3) 0.8256(6) 0.03409(11) 0.0285(16) Uani 1 1 d G . . 
H31 H 0.8246 0.8921 0.0510 0.034 Uiso 1 1 calc R . . 
C32 C 0.8119(6) 0.1289(11) 0.1440(2) 0.0306(19) Uani 1 1 d . . . 
C33 C 0.6865(6) 0.2049(10) 0.0802(2) 0.0329(19) Uani 1 1 d . . . 
C34 C 0.9843(7) 0.2689(12) 0.0101(3) 0.048(2) Uani 1 1 d . . . 
H34A H 1.0532 0.2254 0.0197 0.058 Uiso 1 1 calc R . . 
C35 C 0.9035(7) 0.2875(11) 0.0372(2) 0.041(2) Uani 1 1 d . A . 
H35A H 0.8353 0.3310 0.0270 0.049 Uiso 1 1 calc R . . 
C36 C 0.9136(6) 0.2487(12) 0.0770(2) 0.042(2) Uani 1 1 d D . . 
C37 C 1.0081(19) 0.123(3) 0.0889(8) 0.116(5) Uiso 0.50 1 d PD A 1 
H37A H 0.9804 0.0012 0.0925 0.139 Uiso 0.50 1 calc PR A 1 
H37B H 1.0596 0.1199 0.0678 0.139 Uiso 0.50 1 calc PR A 1 
C38 C 1.0658(16) 0.189(4) 0.1276(6) 0.116(5) Uiso 0.50 1 d PD A 1 
H38A H 1.1376 0.1350 0.1311 0.174 Uiso 0.50 1 calc PR A 1 
H38B H 1.0232 0.1569 0.1498 0.174 Uiso 0.50 1 calc PR A 1 
H38C H 1.0733 0.3187 0.1266 0.174 Uiso 0.50 1 calc PR A 1 
C37A C 0.9954(16) 0.114(2) 0.0955(10) 0.116(5) Uiso 0.50 1 d PD A 2 
H37C H 0.9631 0.0491 0.1171 0.139 Uiso 0.50 1 calc PR A 2 
H37D H 1.0148 0.0266 0.0753 0.139 Uiso 0.50 1 calc PR A 2 
C38A C 1.0974(12) 0.214(4) 0.1116(8) 0.116(5) Uiso 0.50 1 d PD A 2 
H38D H 1.1148 0.3074 0.0930 0.174 Uiso 0.50 1 calc PR A 2 
H38E H 1.1581 0.1307 0.1149 0.174 Uiso 0.50 1 calc PR A 2 
H38F H 1.0841 0.2670 0.1372 0.174 Uiso 0.50 1 calc PR A 2 
  
loop_ 
 _atom_site_aniso_label 
 _atom_site_aniso_U_11 
 _atom_site_aniso_U_22 
 _atom_site_aniso_U_33 
 _atom_site_aniso_U_23 
 _atom_site_aniso_U_13 
 _atom_site_aniso_U_12 
Ru 0.0213(3) 0.0252(3) 0.0188(3) 0.0019(3) 0.0022(2) -0.0005(3) 
O1 0.022(2) 0.047(3) 0.021(2) 0.004(3) 0.003(2) -0.008(3) 
O2 0.085(5) 0.035(4) 0.051(4) 0.021(3) 0.015(3) 0.012(3) 
O3 0.050(4) 0.035(4) 0.063(4) -0.010(3) -0.016(3) -0.007(3) 
O4 0.063(4) 0.123(7) 0.030(4) 0.016(4) 0.006(3) 0.006(5) 
C1 0.017(3) 0.022(4) 0.025(4) -0.003(3) 0.003(3) 0.002(3) 
C2 0.015(3) 0.024(4) 0.020(4) 0.002(3) 0.001(3) -0.005(3) 
C3 0.022(4) 0.025(4) 0.014(3) 0.002(3) 0.000(3) -0.005(3) 
C4 0.020(4) 0.024(4) 0.014(3) 0.004(3) 0.004(3) -0.009(3) 
C5 0.015(3) 0.024(4) 0.024(4) 0.001(3) 0.002(3) -0.003(3) 
C6 0.020(4) 0.034(5) 0.019(4) -0.001(3) 0.001(3) 0.001(3) 
C7 0.029(4) 0.031(4) 0.023(4) -0.002(4) -0.001(3) -0.002(4) 
C8 0.026(4) 0.047(5) 0.034(4) -0.002(4) 0.001(3) -0.011(4) 
C9 0.026(4) 0.046(5) 0.031(4) 0.001(4) -0.006(3) 0.003(4) 
C10 0.032(4) 0.048(5) 0.029(4) 0.011(4) -0.008(4) 0.000(4) 
C11 0.031(4) 0.044(5) 0.033(4) 0.011(4) -0.002(4) -0.007(4) 
C12 0.015(3) 0.033(4) 0.019(4) 0.002(3) 0.000(3) 0.004(3) 
C13 0.024(4) 0.029(5) 0.029(4) 0.007(3) 0.003(3) -0.004(3) 
C14 0.035(4) 0.041(5) 0.036(5) 0.018(4) 0.008(4) 0.001(4) 
C15 0.030(4) 0.058(6) 0.027(4) 0.011(4) 0.008(3) 0.013(4) 
C16 0.058(5) 0.043(5) 0.026(4) -0.002(4) 0.009(4) 0.005(5) 
C17 0.045(5) 0.039(5) 0.031(4) 0.008(4) 0.010(4) -0.005(4) 
C18 0.075(7) 0.087(8) 0.033(5) 0.015(5) 0.028(5) 0.014(6) 
C19 0.021(4) 0.030(4) 0.014(4) -0.002(3) 0.001(3) -0.001(3) 
C20 0.024(4) 0.044(5) 0.029(4) 0.008(4) -0.002(3) -0.007(4) 
C21 0.025(4) 0.056(6) 0.038(5) 0.005(4) 0.000(4) -0.011(4) 
C22 0.023(4) 0.065(7) 0.032(4) -0.006(4) 0.003(3) 0.004(4) 
C23 0.035(5) 0.047(5) 0.032(4) 0.002(4) 0.002(4) 0.016(4) 
C24 0.026(4) 0.034(4) 0.029(4) 0.002(4) 0.001(3) 0.002(3) 
C25 0.027(5) 0.123(10) 0.071(7) 0.007(8) -0.001(4) 0.015(6) 
C26 0.021(3) 0.026(4) 0.021(4) 0.002(4) 0.001(3) 0.004(3) 
C27 0.028(4) 0.033(5) 0.022(4) 0.003(3) -0.002(3) -0.001(4) 
C28 0.038(4) 0.043(6) 0.028(4) -0.001(4) -0.010(4) 0.003(4) 
C29 0.048(5) 0.033(5) 0.025(4) 0.008(4) -0.006(4) 0.005(4) 
C30 0.041(5) 0.029(5) 0.030(4) 0.014(3) 0.007(4) 0.001(4) 
C31 0.032(4) 0.028(4) 0.025(4) 0.006(4) -0.003(3) -0.002(4) 
C32 0.032(4) 0.032(5) 0.028(4) 0.003(4) 0.005(3) 0.003(4) 
C33 0.037(5) 0.023(5) 0.039(5) -0.004(4) -0.001(4) 0.006(4) 
C34 0.048(6) 0.053(6) 0.043(6) -0.002(5) 0.002(4) -0.001(5) 
C35 0.038(5) 0.036(5) 0.051(5) -0.005(4) 0.020(4) -0.001(4) 
C36 0.042(5) 0.051(5) 0.033(5) 0.006(4) 0.013(4) 0.011(4) 
  
_geom_special_details 
; 
 All esds (except the esd in the dihedral angle between two l.s. planes) 
 are estimated using the full covariance matrix.  The cell esds are taken 
 into account individually in the estimation of esds in distances, angles 
 and torsion angles; correlations between esds in cell parameters are only 
 used when they are defined by crystal symmetry.  An approximate (isotropic) 
 treatment of cell esds is used for estimating esds involving l.s. planes. 
; 
  
loop_ 
 _geom_bond_atom_site_label_1 
 _geom_bond_atom_site_label_2 
 _geom_bond_distance 
 _geom_bond_site_symmetry_2 
 _geom_bond_publ_flag 
Ru C33 1.861(8) . ? 
Ru C32 1.880(8) . ? 
Ru C36 2.086(7) . ? 
Ru C4 2.243(7) . ? 
Ru C3 2.253(7) . ? 
Ru C5 2.266(7) . ? 
Ru C2 2.299(7) . ? 
Ru C1 2.358(7) . ? 
O1 C1 1.341(8) . ? 
O2 C32 1.138(9) . ? 
O3 C33 1.158(9) . ? 
O4 C34 1.192(10) . ? 
C1 C2 1.431(9) . ? 
C1 C5 1.435(9) . ? 
C2 C3 1.467(9) . ? 
C2 C6 1.482(7) . ? 
C3 C4 1.426(9) . ? 
C3 C12 1.508(7) . ? 
C4 C5 1.452(9) . ? 
C4 C19 1.500(7) . ? 
C5 C26 1.512(7) . ? 
C6 C7 1.3900 . ? 
C6 C11 1.3900 . ? 
C7 C8 1.3900 . ? 
C8 C9 1.3900 . ? 
C9 C10 1.3900 . ? 
C10 C11 1.3900 . ? 
C12 C13 1.3900 . ? 
C12 C17 1.3900 . ? 
C13 C14 1.3900 . ? 
C14 C15 1.3900 . ? 
C15 C16 1.3900 . ? 
C15 C18 1.542(8) . ? 
C16 C17 1.3900 . ? 
C19 C20 1.3900 . ? 
C19 C24 1.3900 . ? 
C20 C21 1.3900 . ? 
C21 C22 1.3900 . ? 
C22 C23 1.3900 . ? 
C22 C25 1.532(9) . ? 
C23 C24 1.3900 . ? 
C26 C27 1.3900 . ? 
C26 C31 1.3900 . ? 
C27 C28 1.3900 . ? 
C28 C29 1.3900 . ? 
C29 C30 1.3900 . ? 
C30 C31 1.3900 . ? 
C34 C35 1.410(11) . ? 
C35 C36 1.381(11) . ? 
C36 C37A 1.5402(10) . ? 
C36 C37 1.5401(10) . ? 
C37 C38 1.5397(10) . ? 
C37A C38A 1.5397(11) . ? 
  
loop_ 
 _geom_angle_atom_site_label_1 
 _geom_angle_atom_site_label_2 
 _geom_angle_atom_site_label_3 
 _geom_angle 
 _geom_angle_site_symmetry_1 
 _geom_angle_site_symmetry_3 
 _geom_angle_publ_flag 
C33 Ru C32 90.1(3) . . ? 
C33 Ru C36 91.9(3) . . ? 
C32 Ru C36 90.6(3) . . ? 
C33 Ru C4 95.4(3) . . ? 
C32 Ru C4 129.7(3) . . ? 
C36 Ru C4 138.8(3) . . ? 
C33 Ru C3 123.3(3) . . ? 
C32 Ru C3 101.5(3) . . ? 
C36 Ru C3 142.2(3) . . ? 
C4 Ru C3 37.0(2) . . ? 
C33 Ru C5 100.8(3) . . ? 
C32 Ru C5 163.5(3) . . ? 
C36 Ru C5 101.3(3) . . ? 
C4 Ru C5 37.6(2) . . ? 
C3 Ru C5 62.1(2) . . ? 
C33 Ru C2 157.7(3) . . ? 
C32 Ru C2 104.2(3) . . ? 
C36 Ru C2 104.8(3) . . ? 
C4 Ru C2 62.3(2) . . ? 
C3 Ru C2 37.6(2) . . ? 
C5 Ru C2 61.9(2) . . ? 
C33 Ru C1 134.4(3) . . ? 
C32 Ru C1 135.5(3) . . ? 
C36 Ru C1 86.0(3) . . ? 
C4 Ru C1 60.4(2) . . ? 
C3 Ru C1 60.2(2) . . ? 
C5 Ru C1 36.1(2) . . ? 
C2 Ru C1 35.8(2) . . ? 
O1 C1 C2 121.0(6) . . ? 
O1 C1 C5 129.1(6) . . ? 
C2 C1 C5 109.9(6) . . ? 
O1 C1 Ru 126.3(5) . . ? 
C2 C1 Ru 69.8(4) . . ? 
C5 C1 Ru 68.4(4) . . ? 
C1 C2 C3 106.1(5) . . ? 
C1 C2 C6 125.4(5) . . ? 
C3 C2 C6 127.7(5) . . ? 
C1 C2 Ru 74.4(4) . . ? 
C3 C2 Ru 69.5(4) . . ? 
C6 C2 Ru 129.0(4) . . ? 
C4 C3 C2 108.6(5) . . ? 
C4 C3 C12 126.2(6) . . ? 
C2 C3 C12 124.6(5) . . ? 
C4 C3 Ru 71.1(4) . . ? 
C2 C3 Ru 72.9(4) . . ? 
C12 C3 Ru 129.3(4) . . ? 
C3 C4 C5 108.2(5) . . ? 
C3 C4 C19 126.9(5) . . ? 
C5 C4 C19 124.1(5) . . ? 
C3 C4 Ru 71.9(4) . . ? 
C5 C4 Ru 72.1(4) . . ? 
C19 C4 Ru 129.6(4) . . ? 
C1 C5 C4 106.8(6) . . ? 
C1 C5 C26 124.8(5) . . ? 
C4 C5 C26 127.5(5) . . ? 
C1 C5 Ru 75.5(4) . . ? 
C4 C5 Ru 70.4(4) . . ? 
C26 C5 Ru 127.8(4) . . ? 
C7 C6 C11 120.0 . . ? 
C7 C6 C2 119.1(4) . . ? 
C11 C6 C2 120.9(4) . . ? 
C8 C7 C6 120.0 . . ? 
C7 C8 C9 120.0 . . ? 
C8 C9 C10 120.0 . . ? 
C11 C10 C9 120.0 . . ? 
C10 C11 C6 120.0 . . ? 
C13 C12 C17 120.0 . . ? 
C13 C12 C3 123.2(4) . . ? 
C17 C12 C3 116.8(4) . . ? 
C14 C13 C12 120.0 . . ? 
C15 C14 C13 120.0 . . ? 
C16 C15 C14 120.0 . . ? 
C16 C15 C18 120.3(5) . . ? 
C14 C15 C18 119.7(5) . . ? 
C15 C16 C17 120.0 . . ? 
C16 C17 C12 120.0 . . ? 
C20 C19 C24 120.0 . . ? 
C20 C19 C4 122.2(4) . . ? 
C24 C19 C4 117.8(4) . . ? 
C21 C20 C19 120.0 . . ? 
C20 C21 C22 120.0 . . ? 
C21 C22 C23 120.0 . . ? 
C21 C22 C25 121.0(6) . . ? 
C23 C22 C25 119.0(6) . . ? 
C22 C23 C24 120.0 . . ? 
C23 C24 C19 120.0 . . ? 
C27 C26 C31 120.0 . . ? 
C27 C26 C5 120.7(4) . . ? 
C31 C26 C5 119.3(4) . . ? 
C26 C27 C28 120.0 . . ? 
C29 C28 C27 120.0 . . ? 
C30 C29 C28 120.0 . . ? 
C29 C30 C31 120.0 . . ? 
C30 C31 C26 120.0 . . ? 
O2 C32 Ru 177.6(7) . . ? 
O3 C33 Ru 175.2(7) . . ? 
O4 C34 C35 123.6(9) . . ? 
C36 C35 C34 126.5(8) . . ? 
C35 C36 C37A 123.6(16) . . ? 
C35 C36 C37 113.9(12) . . ? 
C37A C36 C37 11(2) . . ? 
C35 C36 Ru 117.9(5) . . ? 
C37A C36 Ru 116.9(14) . . ? 
C37 C36 Ru 127.4(13) . . ? 
C38 C37 C36 109.0(2) . . ? 
C38A C37A C36 109.0(2) . . ? 
  
_diffrn_measured_fraction_theta_max    0.996 
_diffrn_reflns_theta_full              24.00 
_diffrn_measured_fraction_theta_full   0.996 
_refine_diff_density_max    1.507 
_refine_diff_density_min   -1.012 
_refine_diff_density_rms    0.103 
